# Supplementary material
Source: publisher site journal article supplement (https://www.dovepress.com/article/247161)
Supplement: Supplementary file 1 [file get_supplementary_file.php]

Supplementary table 1. A three-group and two-group analysis of covariance (ANCOVA) results with gender and age as a covariate

| A three-group ANCOVA                                                                                             |          |    |         |                      |    |         |                      |    |         |
|------------------------------------------------------------------------------------------------------------------|----------|----|---------|----------------------|----|---------|----------------------|----|---------|
| parameter                                                                                                        | Cortisol |    |         | DHEAS                |    |         | cortisol/DHEAS ratio |    |         |
|                                                                                                                  | F        | df | p-value | F                    | df | p-value | F                    | df | p-value |
| Group <sup>1</sup>                                                                                               | 3.220    | 2  | .045*   | .331                 | 2  | .719    | .326                 | 2  | .723    |
| Gender                                                                                                           | 3.031    | 1  | .085    | 1.744                | 1  | .189    | .017                 | 1  | .898    |
| Age                                                                                                              | .156     | 1  | .694    | 19.341               | 1  | .000*   | 5.973                | 1  | .017*   |
| A two-group ANCOVA in schizophrenia patients without MetS and healthy controls (where significant at $p < .05$ ) |          |    |         |                      |    |         |                      |    |         |
| parameter                                                                                                        | Cortisol |    |         |                      |    |         |                      |    |         |
|                                                                                                                  | F        | Df | p-value |                      |    |         |                      |    |         |
| Group <sup>2</sup>                                                                                               | 7.023    | 1  | .010*   |                      |    |         |                      |    |         |
| Gender                                                                                                           | 5.617    | 1  | .021*   |                      |    |         |                      |    |         |
| Age                                                                                                              | 1.143    | 1  | .290    |                      |    |         |                      |    |         |
| A two-group ANCOVA in schizophrenia patients with MetS and healthy controls (where significant at $p < .05$ )    |          |    |         |                      |    |         |                      |    |         |
| parameter                                                                                                        | DHEAS    |    |         | cortisol/DHEAS ratio |    |         |                      |    |         |
|                                                                                                                  | F        | df | p-value | F                    | Df | p-value |                      |    |         |
| Group <sup>3</sup>                                                                                               | .994     | 1  | .469    | .166                 | 1  | .686    |                      |    |         |
| Gender                                                                                                           | .881     | 1  | .351    | .309                 | 1  | .582    |                      |    |         |
| Age                                                                                                              | 9.512    | 1  | .003*   | 2.978                | 1  | .092    |                      |    |         |

Group<sup>1</sup> – healthy individuals, patients with schizophrenia with metabolic syndrome and patients with schizophrenia without metabolic syndrome. Group<sup>2</sup> – healthy individuals and patients with schizophrenia without metabolic syndrome. Group<sup>3</sup> – healthy individuals and patients with schizophrenia with metabolic syndrome \* -  $p < 0.05$  – statistically significant difference. DHEAS - Dehydroepiandrosterone sulfate

Supplementary table 2. Pearson's correlation analysis of cortisol, DHEAS, and the total PANSS score in patients with schizophrenia without MetS

|                    |         | PANSS, total score | Cortisol | DHEAS |
|--------------------|---------|--------------------|----------|-------|
| PANSS, total score | r       | 1                  | -.038    | .174  |
|                    | p-value |                    | .824     | .170  |
| Cortisol           | r       | -.038              | 1        | .157  |
|                    | p-value | .824               |          | .333  |
| DHEAS              | r       | .174               | .157     | 1     |
|                    | p-value | .170               | .333     |       |

r – Pearson's correlation coefficient; p-value – level of statistical significance of differences

MetS - metabolic syndrome; DHEAS - Dehydroepiandrosterone sulfate; PANSS - The Positive and Negative Syndrome Scale

Supplementary table 3. Pearson's correlation analysis of cortisol, DHEA-S, and the total PANSS score in patients with schizophrenia with MetS

|                    |         | PANSS, total score | Cortisol | DHEAS |
|--------------------|---------|--------------------|----------|-------|
| PANSS, total score | r       | 1                  | -.090    | -.197 |
|                    | p-value |                    | .612     | .216  |
| Cortisol           | r       | -.090              | 1        | -.084 |
|                    | p-value | .612               |          | .637  |
| DHEAS              | r       | -.197              | -.084    | 1     |
|                    | p-value | .216               | .637     |       |

r – Pearson's correlation coefficient; p-value – level of statistical significance of differences

MetS - metabolic syndrome; DHEAS - Dehydroepiandrosterone sulfate; PANSS - The Positive and Negative Syndrome Scale
